# Supplementary material for: Computed and Subjective Blue Scleral Color Analysis as a Diagnostic Tool for Iron Deficiency: A Pilot Study
Source: MDPI journal article supplement (doi:10.3390/jcm8111876), 2019-11-05
Supplement: s1 [file s1]

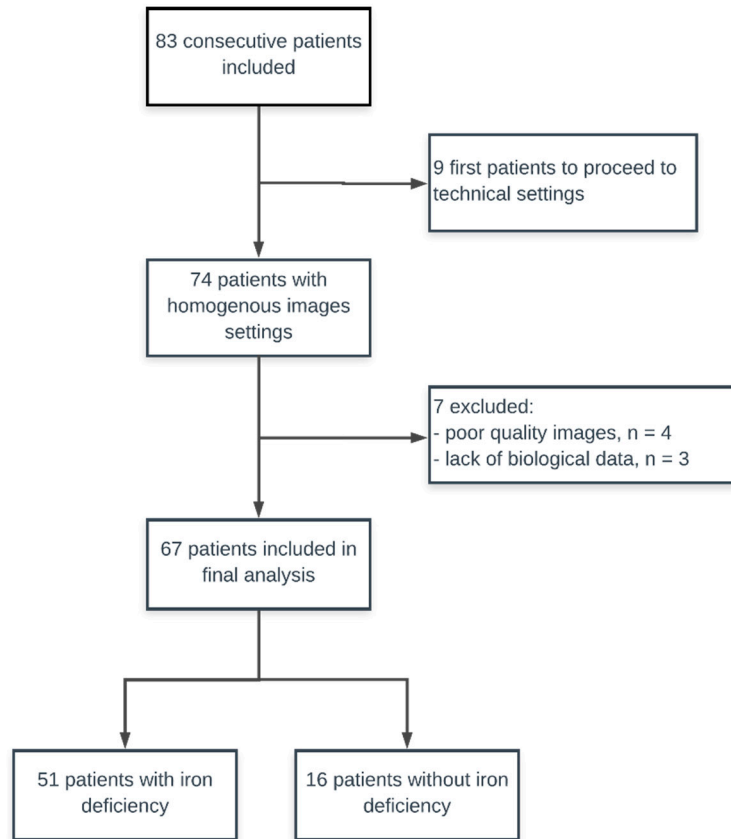

**Figure S1.** Flowchart.

**Table S2.** Baseline characteristics of population.

|                                    | All (n = 67)   | ID (n = 51)   | NID (n = 16)        |
|------------------------------------|----------------|---------------|---------------------|
| Male (%)                           | 30 (44%)       | 19 (37%)      | 11 (68%)            |
| Mean age (yr)                      | 59.9 ± 20.1    | 63.1 ± 20.3   | 49.6 ± 16.4         |
| BMI (kg/m <sup>2</sup> )           | 26.2 ± 7.3     | 26.7 ± 7.8    | 24.5 ± 5.6          |
| Dark iris, n (%)                   | 43 (64%)       | 35 (68%)      | 8 (50%)             |
| Hemoglobin (g/dL)                  | 10.3 ± 2.5     | 9.7 ± 2.1     | 12 ± 3              |
| No. of patients with anemia (male) | 53 (23)        | 46 (19)       | 7 (4)               |
| Mean corpuscular volume (fL)       | 84.4 ± 8.5     | 82.4 ± 7.8    | 90.5 ± 8            |
| Platelet count (G/L)               | 255 ± 116      | 267 ± 113     | 217 ± 119           |
| Ferritin (µg/L)                    | 28.5 (16;75)   | 20.5 (11;34)  | 244.5 (111.7;440.7) |
| TPS (%)                            | 9.6 (6;38.5)   | 8 (6;11)      | 40 (32.5;54)        |
| Fibrinogen (g/L)                   | 4.2 ± 1.8      | 4.2 ± 1.6     | 4.2 ± 2.8           |
| C-reactive protein (g/L)           | 9.6 (2.9;37.5) | 13.5 (3.5;43) | 2.9 (2.9;9)         |

Data are presented as mean ± standard deviation. Ferritin, TPS and C-reactive protein are presented as median and Inter-Quartile-Range. TPS: Transferrin Percent Saturation.
